# Supplementary material for: Asymmetric synthesis of (α-amino)phosphonic acid amphiphiles using chiral P–H spirophosphoranes
Source: Royal Society of Chemistry journal article supplement (doi:10.1039/b304420c), 2003-01-01
Supplement: b304420c.doc [file b304420c.doc]

## Supporting Information

Asymmetric synthesis of (-amino)phosphonic acid amphiphiles using chiral P-H spirophosphoranes

Christophe Déjugnat, Guita Etemad-Moghadam# and Isabelle Rico-Lattes*

Laboratoire des Interactions Moléculaires et Réactivité Chimique et Photochimique, CNRS 5623, Université Paul Sabatier, 118 route de Narbonne, 31062 Toulouse cedex 04, France.

*Fax: +33 (0)5 61558155; Tel: +33 (0)5 61556270; E-mail: rico@chimie.ups-tlse.fr*

## Complete experimental procedures and physico-chemical properties

***General Comments***

Spectra were recorded using the following instruments: IR spectra, Perkin-Elmer IRFT 1600; 1H, 13C and 31P spectra, Brucker AC200 or 250WM; and mass spectra via chemical ionisation (DCI/NH3 or DCI/CH4) or positive FAB modes, Nermag R10-10H. Elemental analyses were performed by the Microanalytical Service Laboratory of the « Laboratoire de Chimie de Coordination » of Toulouse. Octadecylamine, hexadecylamine, dodecylamine, benzaldehyde, phosphorus trichloride, L-valine and dialkyltartrates (Aldrich) were used as received without prior purification. Chloroform and dichloromethane, reagent grade product, was maintained over 4 Å molecular sieves and stored in a dark bottle protected from moisture. Heptane was maintained over sodium.

## Abbreviations used for NMR:

s: singlet; d: doublet; t: triplet; q: quadruplet; m: massive; dt : doublet of triplets, …

## *(S)--hydroxy-isovaleric acid*

This compound was synthesized by nitrosation of the natural L-valine, as reported by Heathcock and coll.: N. A. Van Draanen, N. A., S.Arseniyadis, M. T. Crimmins and C. H. Heathcock, *J. Org. Chem.*,1991, **56** (7), 249

## *P-H spirophosphorane 1 from (S)--hydroxy-isovaleric acid*

To a stirred solution of (*S*)--hydroxy-isovaleric acid (1.35 g, 11.4 mmol) in 25 mL chloroform was added phosphorus trichloride (0.5 mL, 5.7 mmol) at room temperature, under an argon atmosphere. The mixture was heated at 45 °C for 6 h then allowed to stay at 20 °C overnight. The solvent was removed under reduce pressure and afforded the spirophosphorane in a nearly quantitative yield as a white powder which was used without further purification.

**Yield** : 95 %

**31P NMR** (81.01 MHz, CDCl3):= –42.5 (dt, 1*J*PH = 911.8 Hz, 3*J*PH = 8.4 Hz, major isomer, 65%), –45.3 (dt, 1*J*PH = 907.4 Hz, 3*J*PH = 15.3 Hz, minor isomer, 35%)

**1H NMR** (250.13 MHz. CDCl3): major diastereoisomer (65%):7.56 (dt, 1*J*HP = 911.5 Hz, 4*J*HH = 1.6 Hz, 1H, P-**H**) ; 4.52 (ddd, 3*J*HP = 8.5 Hz, 3*J*HH = 3.3 Hz, 4*J*HH = 1.6 Hz, 2H, *C**H**-O) ; 2.27 (m, 2H, C**H*i*Pr**) ; 1.08 (m, 6H, C**H3**) ; 0.98 (m, 6H, C**H3**) ; minor diastereoisomer (35%): 7.51 (d, 1*J*HP = 906.7 Hz, 1H, P-**H**) ; 4.46 (dd, 3*J*HP = 15.4 Hz, 3*J*HH = 4.9 Hz, 2H, *C**H**-O) ; 2.27 (m, 2H, C**H*i*Pr**) ; 1.08 (m, 6H, C**H3**) ; 0.98 (m, 6H, C**H3**)

**13C NMR** (50.32 MHz, CDCl3) :  = 168.30 (d, 2*J*CP = 8.6 Hz, **C**=O major) ; 167.75 (d, 2*J*CP = 10.5 Hz, **C**=O minor) ; 81.96 (d, 2*J*CP = 5.0 Hz, ***C**H-O-P minor) ; 81.45 (d, 2*J*CP = 5.7 Hz, ***C**H-O-P major) ; 31.31-30.64 (m, **C**H*i*Pr) ; 18.33-15.88 (m, **C**H3)

### *P-H spirophosphoranes 2 and 3 from chiral dialkyltartrates*

To a stirred solution of dialkyl tartrate (23 mmol) in 50 mL chloroform was added anhydrous sodium acetate (3.12 g, 38 mmol) at room temperature. Phosphorus trichloride (1 mL, 11.5 mmol) was then added to this suspension. After 3 hours stirring, the crude heterogeneous mixture was centrifuged and the turbid supernatant was concentrated under reduced pressure to give a white jelly residue. This gel was then dissolved in V1 mL chloroform then V2 mL heptane were added: the salts precipitated. A last centrifugation was required to obtain a colourless, limpid supernatant. The solvent was removed under reduced pressure to afford a very thick, colourless oil that was not able to crystallize, even at –18 °C. The spirophosphorane was used without further purification.

*Remark*: 31P NMR analysis of the crude mixture revealed that yields were more than 90% in spirophosphoranes. These compounds are very thick oils that can contain, after purification, traces of P-H monocyclic phosphonates (31P = +24) due to partial hydrolysis (see A. Munoz, C. Hubert and J.-L. Luche, *J. Org. Chem.*, 1996, **17**, 6015). However, as these P-H phosphonates are very reactive towards imines and finally gave after hydrolysis the same products than with P-H spirophosphoranes, they were not removed.

#### *P-H spirophosphoranes (R)-2 and (S)-2, from (R,R)- and (S,S)-diethyltartrate*

Operating mode and analytical data are identical for these two enantiomeric compounds.

The synthesis was achieved with 4.72 g diethyltartrate.

For the purification step, V1 = 30 mL and V2 = 9 mL.

**Yield** : 95 %

**31P NMR** (81.01 MHz, CDCl3) : = -22.5 (dtt, 1*J*PH = 871.3 Hz, 3*J*PH = 16.3 Hz, 3*J*PH = 10.9 Hz)

**1H NMR** (200.13 MHz, CDCl3) :  = 7.45 (d, 1*J*HP = 871.6 Hz, 1H, P-**H**) ; 4.66 (dd, 3*J*HP = 10.7 Hz, 3*J*HH = 5.2 Hz, 2H, *C**H**-O-P) ; 4.50 (dd, 3*J*HP = 16.5 Hz, 3*J*HH = 5.1 Hz, 2H, *C**H**-O-P) ; 4.21 (q, 3*J*HH = 7.1 Hz, 4H, C**H2**-O) ; 4.20 (q, 3*J*HH = 7.1 Hz, 4H, C**H2**-O) ; 1.23 (t, 3*J*HH = 6.5 Hz, 12H, C**H3**)

**13C NMR** (62.90 MHz, CDCl3) :  = 168.92 (d, 3*J*CP = 7.6 Hz, **C**=O) ; 168.01 (d, 3*J*CP = 5.1 Hz, **C**=O) ; 72.25 (s, ***C**H-O-P) ; 71.96 (s, ***C**H-O-P) ; 62.10 (s, **C**H2-O) ; 13.99 (s, **C**H3)

P-H spirophosphorane (R)-3 from (R,R)-dibutyltartrate

The synthesis was achieved with 6.01 g (*R*,*R*)-dibutyltartrate.

For the purification step, V1 = 0 mL and V2 = 30 mL.

###### **Yield** : 92 %

**31P NMR** (81.01 MHz, CDCl3) : = -22.3 (dtt, 1*J*PH = 871.9 Hz, 3*J*PH = 15.3 Hz, 3*J*PH = 10.7 Hz)

**1H NMR** (200.13 MHz, CDCl3) :  = 7.50 (d, 1*J*HP = 871.7 Hz, 1H, P-**H**) ; 4.70 (dd, 3*J*HP = 10.1 Hz, 3*J*HH = 5.4 Hz, 2H, *C**H**-O-P) ; 4.55 (dd, 3*J*HP = 15.8 Hz, 3*J*HH = 5.4 Hz, 2H, *C**H**-O-P) ; 4.20 (t, 3*J*HH = 6.7 Hz, 8H, C**H2**-O) ; 1.64 (tt, 3*J*HH = 6.7 Hz, 8H, C**H2**-C-O) ; 1.36 (tq, 3*J*HH = 6.7 Hz, 3*J*HH = 7.3 Hz, 8H, C**H2**-Me) ; 0.91 (t, 3*J*HH = 7.3 Hz, 12H, C**H3**)

**13C NMR** (50.32 MHz, CDCl3) :  = 168.96 (d, 3*J*CP = 8.3 Hz, **C**=O) ; 168.03 (d, 3*J*CP = 5.4 Hz, **C**=O) ; 72.30 (s, ***C**H-O-P) ; 71.96 (s, ***C**H-O-P) ; 65.83 (s, **C**H2-O) ; 30.39 (s, **C**H2) ; 18.90 (s, **C**H2) ; 13.55 (s, **C**H3)

### *Aldimines 4-6*

These compounds were synthesized from benzaldehyde and octadecylamine, hexadecylamine or dodecylamine, as described previously: K. Vercruysse, C. Déjugnat, A. Munoz and G. Etemad-Moghadam, *Eur. J. Org. Chem.*,2000, 281

##### P-C spirophosphorane 7

Thereaction was carried out under an argon atmosphere. Imine **4** (10 mmol) in anhydrous dichloromethane (10 mL) was added dropwise to a stirred solution of spirophosphorane **1** (10 mmol) in anhydrous dichloromethane (20 mL) at room temperature. The progress of the reaction was monitored by 31P NMR analysis. The addition reaction occurred instantaneously and afforded (-aminoalkyl)spirophosphorane **7** in quantitative yields. In spite of its stability in solution under an argon atmosphere during several days, all attempts for its purification failed due to its decomposition into tetracoordinated phosphorus compounds. In order to characterize this PV-C bond spirophosphorane, the reaction was then analyzed directly in an NMR tube in deuteriated solvent under an argon atmosphere. Imine **4** (0.3 mmol) in CDCl3 (0.5 mL) was added to a solution of spirophosphorane **1** (0.3 mmol) in CDCl3 (0.5 mL) at room temperature. (-Aminoalkyl)spirophosphorane **7** was instantaneously and quantitatively formed and characterized by 31P, 1H and 13C NMR analysis.

The four isomers of **7** are called *a*, *b*, *c* and *d* (*a* giving the most deshielding 31P NMR signal and *d* the most shielding one). The ratios between these four diastereoisomers are varying with time (see article).

**31P NMR** (81.01 MHz, CDCl3) :  = -26.3 (dt, 2*J*PH = 24.9 Hz, 3*J*PH = 7.2 Hz, *a*) ; -27.3 (dt, 2*J*PH = 24.0 Hz, 3*J*PH = 13.5 Hz, *b*) ; -27.7 (dt, 2*J*PH = 24.0 , 3*J*PH = 8.4 Hz, *c*) ; -28.3 (dt, 2*J*PH = 19.9 Hz, 3*J*PH = 11.8 Hz, *d*)

**1H NMR** (250.13 MHz, CDCl3) : 7.36 (m, 5H, C**HPh**) ; 4.53 (d, 2*J*HP = 21.9 Hz, 1H, C**H**-P, *d*) ; 4.40 (d, 2*J*HP = 25.2 Hz, 1H, C**H**-P, *a*) ; 4.36 (d, 2*J*HP = 24.0 Hz, 1H, C**H**-P, *b*) ; 4.07 (dd, 3*J*HP = 13.7 Hz, 3*J*HH = 7.7 Hz, 1H, C**H**-O-P, *d*) ; 4.05 (tapp, 3*J*HP = 3*J*HH = 7.6 Hz, *a*) ; 3.80 (dd, 3*J*HP = 13.8 Hz, 3*J*HH = 3.9 Hz, 1H, C**H**-O-P, *b*) ; 2.47 and 2.38 (2m, 2H, C**H2**-N) ; 2.11 (m, 2H, C**HiPr**) ; 1.23 (m, 32H, C**H2**) ; 1.00-0.78 (m, 15H, C**H3**)

**13C NMR** (62.90 MHz, CDCl3) : 168.99 (d, 2*J*CP = 9.9 Hz, **C**=O, *b*) ; 168,35 (d, 2*J*CP = 9.9 Hz, **C**=O, *d*) ; 134.61 (s, **Cipso**, *b*) ; 134,57 (s, **Cipso**, *d*) ; 130.77-127.59 (m, C**HPh**) ; 81.60 (s, **C**H-O-P, *b*) ; 81.50 (s, **C**H-O-P, *d*) ; 68.08 (d, 1*J*CP = 175.5 Hz, CH-P, *d*) ; 67.38 (d, 1*J*CP = 185.3 Hz, CH-P, *b*) ; 47.71 (d, 3*J*CP = 22.7 Hz, **C**H2-N) ; 31.91-22.68 (m, **C**H2) ; 30.63 (s, **C**HiPr) ; 18.85 (s, **C**H3iPr, *d*) ; 18.27 (s, **C**H3iPr, *b*) ; 16.98 (s, **C**H3iPr, *d*) ; 16.37 (s, **C**H3iPr, *b*) ; 14.10 (s, **C**H3 chain)

***-aminophosphonocarboxylic acid 8***

The reaction was carried out under an argon atmosphere. Imine **4** (10 mmol) dissolved in 10 mL chloroform was added to a solution of spirophosphorane **1** (10 mmol) in 20 mL chloroform. The mixture was stirred at room temperature during 1 h then concentrated to dryness under vacuum. The oily residue was washed with water then acetonitrile and the crude monoester **8** precipitated as a white powder. The two diastereoisomers were separated and purified. So, diastereoisomer ***A*** precipitated in the presence of isopropanol and was thus obtained by selective precipitation. Moreover, diastereoisomer ***B*** was less soluble in 1,4-dioxane than ***A*** and was isolated by successive enrichments. The initial mixture contained 18 % A and 82 % B, as determined by 31P NMR.

***Diastereoisomer 8A***

**Yield** : 13 % (white powder) – *Relative yield: 13/18 = 72 %*

**M.p.** = 175-176 °C (from isopropanol)

**31P NMR** (81.01 MHz, CDCl3/CD3COOD 4:1) : = 9.1 (dd, 2*J*PH = 17.6 Hz, 3*J*PH = 7.2 Hz)

**1H NMR** (250.13 MHz, CDCl3/CD3COOD 4:1) : = 7.45 (m, 2H, C**HPh**) ; 7.28 (m, 3H, C**HPh**) ; 4.56 (d, 2*J*HP = 17.9 Hz,1H, *C**H**-P) ; 4.49 (dd, 3*J*HP = 7.7 Hz, 3*J*HH = 3.4 Hz,1H, *C**H**-O-P) ; 2.71 (t, 3*J*HH = 7.7 Hz, 2H, C**H2**-N) ; 1.95 (m, 1H, C**H*i*Pr**) ; 1.66 (m, 2H, C**H2**-C-N) ; 1.15 (m, 31H, 15 C**H2** chain + N**H**) ; 0.75 (m, 6H, C**H3**chain + one *i*Pr ) ; 0.63 (d, 3*J*HH = 6.7 Hz, 3H, C**H3 *i*Pr**)

**13C NMR** (62.90 MHz, CDCl3) : = 176.37 (s, **C**=O) ; 129.36 (d, 2*J*CP = 5.3 Hz, **Cipso**) ; 129.32-128.87 (m, **C**H**Ph**) ; 77.91 (d, 2*J*CP = 7.0 Hz, **C**H-OP) ; 60.59 (d, 1*J*CP = 143.9 Hz, **C**H-P) ; 46.96 (s, **C**H2-N) ; 31.77-22.52 (m, **C**H2) ; 31.11 (d, 3*J*CP = 6.2 Hz, **C**H*i*Pr) ; 18.09 (s, **C**H3) ; 15.88 (s, **C**H3) ; 13.81 (s, **C**H3 chain)

**IR** (KBr, cm-1) :  = 3480.0 (O-H, N-H) ; 1724.5 (C=O) ; 1633.9 (C=C) ; 1200.0 (P=O) ; 1074.7 (P-O)

**MS** (DCI/NH3) : *m/z* 358 (PhCHNHC18H37)+ ; 522 (M – H2O + H)+ ; 539 (M – H2O + NH4)+

**Elemental analyses** (C30H54NO5P, 539.74) : *Calculated* : C : 66.76 ; H : 10.08 ; N : 2.60 ; *Found* : C : 66.71 ; H : 10.05 ; N : 2.48

**Optical activity** : [] = – 33.1 (c = 0.53 , NaOH 1 M)

***Diastereoisomer 8B***

**Yield**: 44 % (brilliant powder) – *Relative yield: 44/82 = 54 %*

**M.p.** > 120 °C (decomposition)

**31P NMR** (81.01 MHz, CDCl3/CD3COOD 4:1) : = 8.8 (dd, 2*J*PH = 15.2 Hz, 3*J*PH = 9.7 Hz)

**1H NMR** (200.13 MHz, CDCl3/CD3COOD 4:1) : = 7.57 (m, 2H, C**HPh**) ; 7.40 (m, 3H, C**HPh**) ; 4.79 (dd, 3*J*HP = 9.3 Hz, 3*J*HH = 2.4 Hz,1H, *C**H**-O-P) ; 4.54 (d, 2*J*HP = 16.6 Hz,1H, *C**H**-P) ; 2.80 (m, 2H, C**H2**-N) ; 2.09 (m, 1H, C**H*i*Pr**) ; 1.74 (m, 2H, C**H2**-C-N) ; 1.29 (m, 31H, 15 C**H2** chain + N**H**) ; 1.03 (d, 3*J*HH = 6.6 Hz, 3H, C**H3 *i*Pr**) ; 0.91 (d, 3*J*HH = 5.4 Hz, C**H3 *i*Pr**) ; 0.90 (m, 3H, C**H3**chain)

**13C NMR** (50.32 MHz, CDCl3/CD3COOD 4:1) : = 176.69 (s, **C**=O) ; 129.19 (s, **Cipso**) ; 129.54-128.98 (m, **C**H**Ph**) ; 78.87 (sbroad, **C**H-OP) ; 60.14 (d, 1*J*CP = 139.7 Hz, **C**H-P) ; 46.70 (sbroad, **C**H2-N) ; 31.82-22.57 (m, **C**H2) ; 31.29 (s, **C**H*i*Pr) ; 18.62 (s, **C**H3) ; 15.79 (s, **C**H3) ; 13.88 (s, **C**H3 chain)

**IR** (KBr, cm-1) :  = 3441.9 (O-H, N-H) ; 1718.7 (C=O) ; 1611.7 (C=C) ; 1213.1 (P=O) ; 1042.5 (P-O)

**MS** (DCI/NH3) : *m/z* 358 (PhCHNHC18H37)+ ; 522 (M – H2O + H)+

**Elemental analyses** (C30H54NO5P, 539.74) : *Calculated* : C : 66.76 ; H : 10.08 ; N : 2.60 ; *Found* : C : 66.96 ; H : 10.82 ; N : 2.60

**Optical activity** : [] = – 1.5 (c = 0.53 , NaOH 1 M)

Monoesters 9-12 bearing a dialkyltartrate moiety

The reaction was carried out under an argon atmosphere. Imine **4**,**5** or **6** (10 mmol) dissolved in 10 mL chloroform was added to a solution of spirophosphorane **2** or **3** (10 mmol) in 20 mL chloroform. The mixture was stirred at room temperature during several days (the reaction was monitored by 31P NMR). When the signal of the initial P-H spirophosphorane decreased below 5%, the solution was concentrated to dryness under vacuum and the oily residue was washed with water to achieve the hydrolysis reaction.

31P NMR revealed that, in each case, the ratio between diastereoisomers **A** and **B** was almost always A/B = 55/45 (**A** is the diastereoisomer giving the most deshielding signal). For compounds **(R)-9-12** and **(S)-10**, only the diastereoisomers **A** were purified.

After hydrolysis with water, the crude mixture was filtered and the residue was washed with acetone. The obtained white powder was then washed with diethyl ether: only the diastereoisomer A remained insoluble and was then obtained in an enantiomerically pure form. It was washed several times with diethyl ether then recrystallized in acetone.

***Monoester (R)-9A, from (R,R)-diethyltartrate and aldimine 4***

**Yield** : 39 % (white powder) – *Relative yield: 39/55 = 71 %*

**M.p.** = 152-153 °C (from acetone)

**31P** **NMR** (81.01 MHz, CDCl3) : = 7.6 (dd, 2*J*PH = 16.7 Hz, 3*J*PH = 10.0 Hz)

**31P** **NMR** (81.01 MHz, CHCl3) : = 8.8 (dd, 2*J*PH = 17.4 Hz, 3*J*PH = 9.6 Hz)

**1H** **NMR** (200.13 MHz, CDCl3) : = 11.59 (m, 1H, O**H**) ; 7.73-7.34 (m, 5H, C**HPh**) ; 5.26 (d, 3*J*HP = 9.8 Hz, 1H, *C**H**-O-P) ; 5.00 (m, 1H, O**H**) ; 4.64 (sbroad, 1H, *C**H**-OH) ; 4.50-4.10 (m, 5H, *C**H**-P + 2 C**H2**-O) ; 2.79 and 2.57 (2m, 2H, C**H2**-N) ; 1.73 (m, 2H, C**H2**-C-N) ; 1.25 (m, 37H, 15 C**H2** chain + N**H** + 2 C**H3**-C-O) ; 0.85 (t, 3*J*HH = 6.6 Hz, 3H, C**H3**)

**13C** **NMR** (50.32 MHz, CDCl3) : = 172.25 (s, **C**=O) ; 170.07 (s, **C**=O) ; 131.29 (d, 2*J*CP = 5.4 Hz, **Cipso**) ; 129.44-128.45 (m, **C**H**Ph**) ; 75.17 (d, 2*J*CP = 6.5 Hz, **C**H-OH) ; 72.35 (d, 3*J*CP = 5.0 Hz, **C**H-O-P) ; 62.17 (s, **C**H2-O) ; 62.04 (s, **C**H2-O) ; 60.94 (d, 1*J*CP = 140.3 Hz, **C**H-P) ; 46.29 (d, 3*J*CP = 7.6 Hz, **C**H2-N) ; 31.95-22.72 (m, **C**H2) ; 14.16 (s, **C**H3)

**IR** (KBr, cm-1) :  = 3239.1 (O-H, N-H) ; 1758.9 (C=O) ; 1622.0 (C=C) ; 1211.0 (P=O) ; 1072.6 (P-O)

**MS** (DCI / NH3) : *m/z* 358 (PhCHNHC18H37)+ ; 628 (M + H)+

**Elemental analyses** (C33H58NO8P, 627.80) : *Calculated* : C : 63.14 ; H : 9.31 ; N : 2.23 ; *Found* : C : 62.72 ; H : 9.28 ; N : 2.17

**Optical activity** : [] = – 20.2 (c = 1.2 , CHCl3)

***Monoester (S)-9A, from (S,S)-diethyltartrate and aldimine 4***

All the spectroscopic data were identical to those of its enantiomer **(*R*)-9A**.

**Yield** : 37 % (white powder) – *Relative yield: 37/55 = 67 %*

**M.p.** = 151-152 °C (from acetone)

**Elemental analysis** (C33H58NO8P, 627.80) : *Calculated* : C : 63.14 ; H : 9.31 ; N : 2.23 ; *Found* : C : 63.09 ; H : 9.35 ; N : 2.17

**Optical activity** : [] = + 20.6 (c = 1.2 , CHCl3)

***Monoester (R)-10A, from (R,R)-dibutyltartrate and aldimine 4***

**Yield** : 35 % (white powder) – *Relative yield: 35/55 = 64 %*

**M. p.** = 144-145 °C (from acetone)

**31P** **NMR** (81.01 MHz, CDCl3) : = 7.6 (dd, 2*J*PH = 15.9 Hz, 3*J*PH = 10.2 Hz)

**31P** **NMR** (81.01 MHz, CHCl3) : = 8.4 (dd, 2*J*PH = 17.3 Hz, 3*J*PH = 10.4 Hz)

**1H** **NMR** (200.13 MHz, CDCl3) : = 11.66 (m, 1H, O**H**) ; 7.73-7.34 (m, 5H, C**HPh**) ; 5.24 (d, 3*J*HP = 9.2 Hz, 1H, *C**H**-O-P) ; 4.95 (m, 1H, O**H**) ; 4.56 (sbroad, 1H, *C**H**-OH) ; 4.32 (d, 2*J*HP = 17.6 Hz, 1H, *C**H**-P) ; 4.23 (m, 4H, 2 C**H2**-O) ; 2.83 and 2.61 (2m, 2H, C**H2**-N) ; 1.71 (m, 7H, 2 C**H2**-C-O + C**H2**-C-N + N**H**) ; 1.25 (m, 34H, 15 C**H2** chain + 2 C**H2** butyls) ; 0.91 (m, 9H, 3 C**H3**)

**13C** **NMR** (50.32 MHz, CDCl3) : = 172.69 (s, **C**=O) ; 170.30 (s, **C**=O) ; 131.08 (d, 2*J*CP = 5.4 Hz, **Cipso**) ; 129.39-128.51 (m, **C**H**Ph**) ; 75.24 (d, 2*J*CP = 6.5 Hz, **C**H-O-P) ; 72.34 (d, 3*J*CP = 4.5 Hz, **C**H-O-H) ; 66.18 (s, **C**H2-O) ; 65.98 (s, **C**H2-O) ; 60.94 (d, 1*J*CP = 139.8 Hz, **C**H-P) ; 46.16 (d, 3*J*CP = 7.9 Hz, **C**H2-N) ; 31.98-19.09 (m, **C**H2) ; 14.20 (s, **C**H3 chain) ; 13.77 (s, **C**H3 butyls)

**IR** (KBr, cm-1) :  = 3241.9 (O-H, N-H) ; 1753.3 (C=O) ; 1625.4 (C=C) ; 1211.6 (P=O) ; 1069.8 (P-O)

**MS** (DCI / NH3) : *m/z* 358 (PhCHNHC18H37)+ ; 684 (M + H)+ ; 666 (M + H - H2O)+

**Elemental analyses** (C37H66NO8P, 683.91) : *Calculated* : C : 64.98 ; H : 9.73 ; N : 2.05 ; *Found* : C : 64.55 ; H : 9.65 ; N : 2.01

**Optical activity** : [] = – 19.6 (c = 1.2 , CHCl3)

***Monoester (R)-11A, from (R,R)-dibutyltartrate and aldimine 5***

**Yield** : 35 % (white powder) – *Relative yield: 35/55 = 64 %*

**31P** **NMR** (81.01 MHz, CDCl3) : = 8.2 (dd, 2*J*PH = 17.5 Hz, 3*J*PH = 10.1 Hz)

**1H** **NMR** (200.13 MHz, CDCl3) : = 11.52 (m, 1H, O**H**) ; 7.77-7.30 (m, 5H, C**HPh**) ; 5.25 (d, 3*J*HP = 8.4 Hz, 1H, *C**H**-O-P) ; 4.98 (m, 1H, O**H**) ; 4.57 (sbroad, 1H, *C**H**-OH) ; 4.34-4.13 (m, 5H, *C**H**-P + 2 C**H2**-O) ; 2.87 and 2.64 (2m, 2H, C**H2**-N) ; 1.75 (m, 7H, 2 C**H2**-C-O + C**H2**-C-N + N**H**) ; 1.25 (m, 30H, 13 C**H2** chain + 2 C**H2** butyls) ; 0.90 (m, 9H, 3 C**H3**)

**13C** **NMR** (50.32 MHz, CDCl3) : = 172.67 (s, **C**=O) ; 170.32 (s, **C**=O) ; 131.07 (d, 2*J*CP = 5.1 Hz, **Cipso**) ; 129.40-128.53 (m, **C**H**Ph**) ; 75.22 (d, 2*J*CP = 6.2 Hz, **C**H-O-P) ; 72.31 (d, 3*J*CP = 4.8 Hz, **C**H-O-H) ; 66.17 (s, **C**H2-O) ; 66.00 (s, **C**H2-O) ; 60.92 (d, 1*J*CP = 139.4 Hz, **C**H-P) ; 46.16 (d, 3*J*CP = 7.8 Hz, **C**H2-N) ; 31.99-19.08 (m, **C**H2) ; 14.22 (s, **C**H3 chain) ; 13.74 (s, **C**H3 butyls)

**IR** (KBr, cm-1) :  = 3248.5 (O-H, N-H) ; 1754.1 (C=O) ; 1625.4 (C=C) ; 1212.0 (P=O) ; 1069.5 (P-O)

**MS** (DCI / NH3) : *m/z* 330 (PhCHNHC16H33)+ ; 656 (M + H)+

**Elemental analyses** (C35H62NO8P, 655.85) : *Calculated* : C : 64.10 ; H : 9.53 ; N : 2.14 ; *Found* : C : 64.41 ; H : 10.02 ; N : 2.19

**Optical activity** : [] = – 18.6 (c = 1.2 , CHCl3)

***Monoester (R)-12A, from (R,R)-dibutyltartrate and aldimine 6***

**Yield** : 38 % (white powder) – *Relative yield: 38/55 = 69 %*

**M. p.** = 164-165 °C (from acetone)

**31P** **NMR** (81.01 MHz, CHCl3) : = 8.1 (dd, 2*J*PH = 16.3 Hz, 3*J*PH = 9.7 Hz)

**1H** **NMR** (250.13 MHz, CDCl3) : = 7.74-7.37 (m, 5H, C**HPh**) ; 5.34 (d, 3*J*HP = 9.8 Hz, 1H, *C**H**-O-P) ; 5.10 (m, 1H, O**H**) ; 4.64 (d, 3*J*HH = 7.0 Hz, 1H, *C**H**-OH) ; 4.34-4.08 (m, 5H, *C**H**-P + 2 C**H2**-O) ; 2.84 and 2.56 (2m, 2H, C**H2**-N) ; 1.69 (m, 7H, 2 C**H2**-C-O + C**H2**-C-N + N**H**) ; 1.40 (m, 4H, 2 C**H2** butyls) ; 1.17 (m, 18H, 9 C**H2** chain) ; 0.98-0.92 (m, 6H, 2 C**H3** butyls) ; 0.86 (t, 3*J*HH = 6.9 Hz, 3H, C**H3**)

**13C** **NMR** (62.90 MHz, CDCl3) : = 172.61 (s, **C**=O) ; 170.27 (s, **C**=O) ; 131.12 (d, 2*J*CP = 5.0 Hz, **Cipso**) ; 129.38-128.44 (m, **C**H**Ph**) ; 75.16 (d, 2*J*CP = 6.5 Hz, **C**H-O-P) ; 72.31 (d, 3*J*CP = 4.6 Hz, **C**H-O-H) ; 66.09 (s, **C**H2-O) ; 65.91 (s, **C**H2-O) ; 60.97 (d, 1*J*CP = 139.7 Hz, **C**H-P) ; 46.15 (d, 3*J*CP = 7.9 Hz, **C**H2-N) ; 33.93-19.03 (m, **C**H2) ; 14.10 (s, **C**H3 chain) ; 13.70 (s, **C**H3 butyles)

**IR** (KBr, cm-1) :  = 3248.5 (O-H, N-H) ; 1757.7 (C=O) ; 1626.2 (C=C) ; 1212.6 (P=O) ; 1070.5 (P-O)

**MS** (FAB>0, MNBA stamp) : *m/z* 274 (PhCHNHC12H25)+ ; 600 (M + H)+ ; 622 (M + Na)+

**Elemental analyses** (C31H54NO8P, 599.75) : *Calculated* : C : 62.08 ; H : 9.08 ; N : 2.34 ; *Found* : C : 62.21 ; H : 9.20 ; N : 2.92

**Optical activity** : [] = – 19.1 (c = 1.2 , CHCl3) ; [] = – 13.4 (c = 1.6 , CH2Cl2)

***N-octadecyl-(-aminobenzyl)phosphonic acid 13***

This chiral amphiphile was synthesized by acidic cleavage of the monoester moiety in enantiopure compounds **8A**, **8B**, **(R)-9A**, **(S)-9A** and **(R)-10A**.

The enantiopure monoester (0.5 mmol) was placed in 25 mL hydrochloric acid (20% aqueous solution). The suspension was then refluxed during 10 to 14 hours (the reaction was monitored by 31P NMR analysis). After cooling to room temperature, the mixture was concentrated to dryness and the residue was dried under reduce pressure (2 mm Hg, 40 °C, 4 hours). The solid was then washed with water, filtered and recrystallized in a isopropyl alcohol – water 3 :1 mixture. The enantiomers **(+)-13** and **(-)-13** were then obtained as thin sharp crystals.

The enantiopure phosphonic acid presented exactly the same spectroscopic characteristics as its racemic analog (we described this racemic acid in a previous paper: K. Vercruysse, C. Déjugnat, A. Munoz and G. Etemad-Moghadam, *Eur. J. Org. Chem.*,2000, 281).

Enantiomer (+)-13

This enantiomer was obtained by hydrolysis of **8B**, **(R)-9A** or **(R)-10A**

**Yield :** 81 %

**M. p.** > 190 °C (decomposition)

**HRMS** (LCI<0, Gly/MNBA stamp; calc.for M-H (C25H45NO3P) = 438.314): *m/z* 438.312 (M-H)-

**Optical activity** : [] = + 18.3 (c = 0.6 , CHCl3/MeOH : 1/1)

Enantiomer (-)-13

This enantiomer was obtained by hydrolysis of **5B** or **(S)-9A**. It presents exactly the same properties as its enantiomer **(+)-13**, except opposite optical activity.

**Optical activity** : [] = - 18.3 (c = 0.6 , CHCl3/MeOH : 1/1)

***N-hexadecyl-(-aminobenzyl)phosphonic acid (+)-14***

This compound was synthesized by acidic treatment of monoester **(R)-11A**, as described for acid **13**.

The enantiopure phosphonic acid **(+)-14** presented exactly the same spectroscopic characteristics as its racemic analog (we described this racemic acid in a previous paper: K. Vercruysse, C. Déjugnat, A. Munoz and G. Etemad-Moghadam, *Eur. J. Org. Chem.*,2000, 281).

**Yield :** 80 %

**M. p.** > 190 °C (decomposition)

**HRMS** (LCI<0, Gly/MNBA stamp; calc.for M-H (C23H41NO3P) = 410.283): *m/z* 410.279 (M-H)-

**Optical activity** : [] = + 17.7 (c = 0.6 , CHCl3/MeOH : 1/1)

***N-dodecyl-(-aminobenzyl)phosphonic acid (+)-15***

This compound was synthesized by acidic treatment of monoester **(R)-12A**, as described for acid **13**.

The enantiopure phosphonic acid **(+)-15** presented exactly the same spectroscopic characteristics as its racemic analog (we described this racemic acid in a previous paper: K. Vercruysse, C. Déjugnat, A. Munoz and G. Etemad-Moghadam, *Eur. J. Org. Chem.*,2000, 281).

**Yield :** 78 %

**M. p.** > 190 °C (decomposition)

**HRMS** (LCI<0, Gly/MNBA stamp; calc.for M-H (C19H33NO3P) = 354.220): *m/z* 354.219 (M-H)-

**Optical activity** : [] = + 18.5 (c = 0.6 , CHCl3/MeOH : 1/1)
